# Supplementary material for: Physiological and Morphological Aspects of Aedes aegypti Developing Larvae: Effects of the Chitin Synthesis Inhibitor Novaluron
Source: PubMed Central journal article supplement (PMC3265478; doi:10.1371/journal.pone.0030363), 2012-01-24

**Supplementary Figure 2** – Farnesi et al (Physiological and morphological aspects of *Aedes aegypti* developing larvae: effects of the chitin synthesis inhibitor novaluron)

The following slides present histological cross sections of control and novaluron-treated (E1<sub>99</sub>) *Ae. aegypti* larvae at the mesothorax region.

In all sections ventral side is down (i.e. the ventral thoracic ganglion is always at the bottom).

For further details, please check Methods, section 7 and Figure 5 of the main text.

Number in the panels denote the sequence of cross sections.

The next 6 slides show cross sections of 4 control larvae at the L4I stage.

First control L4I

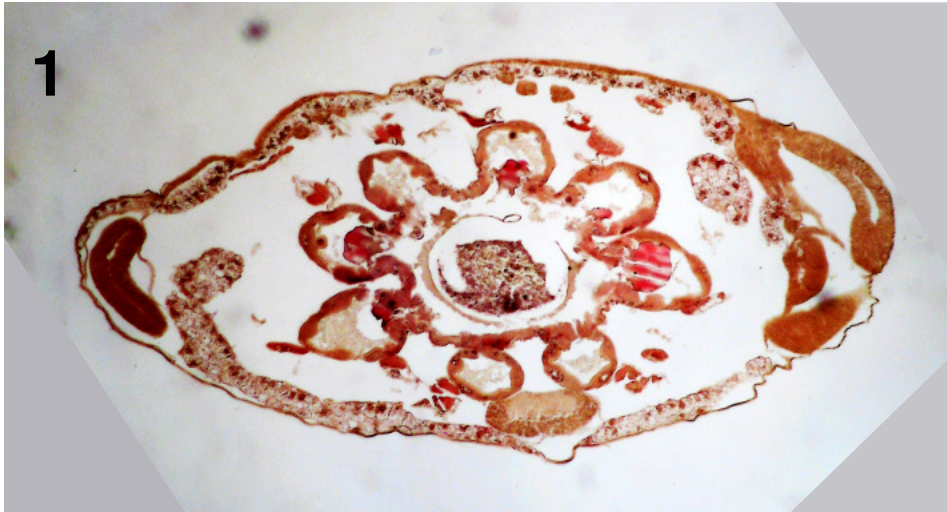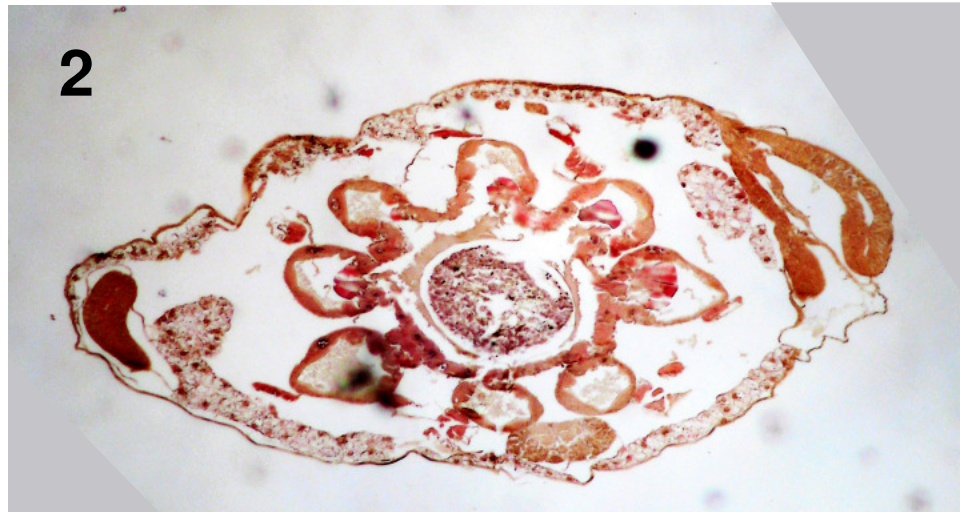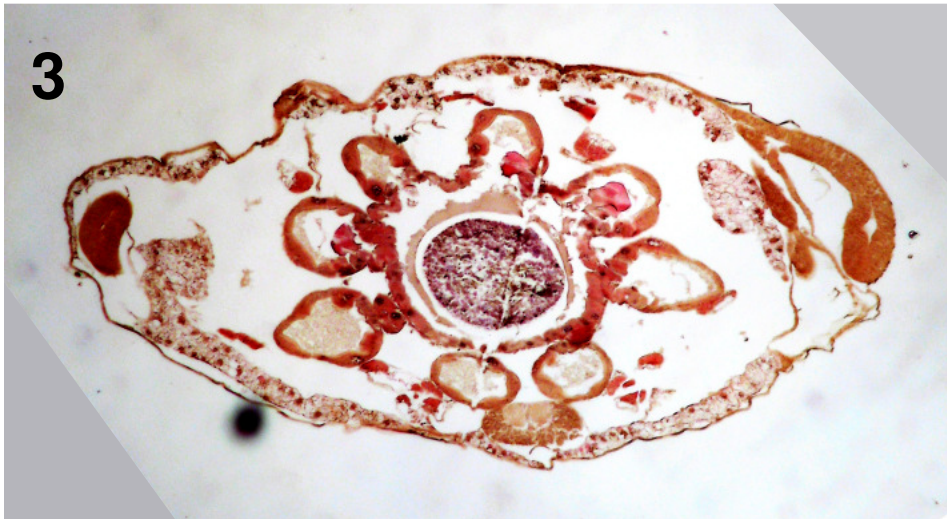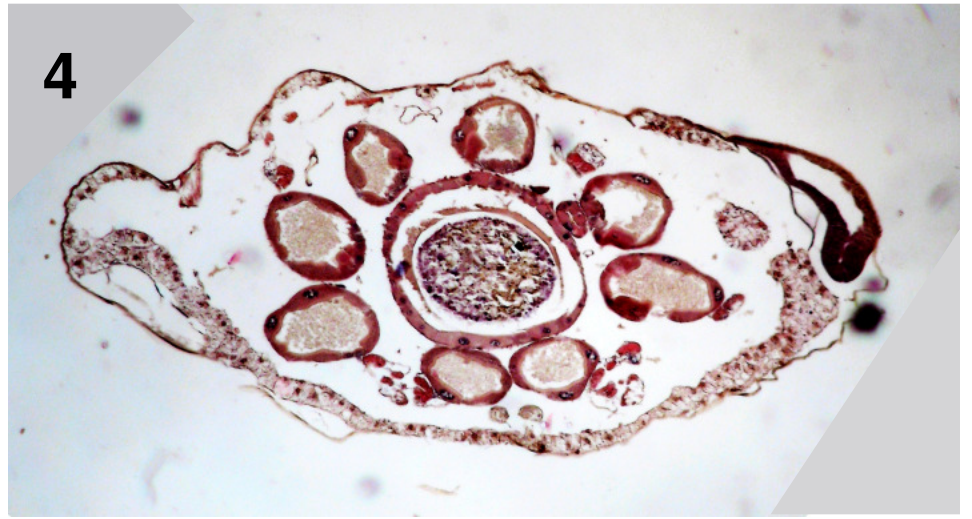



First control L4I (continued)

5

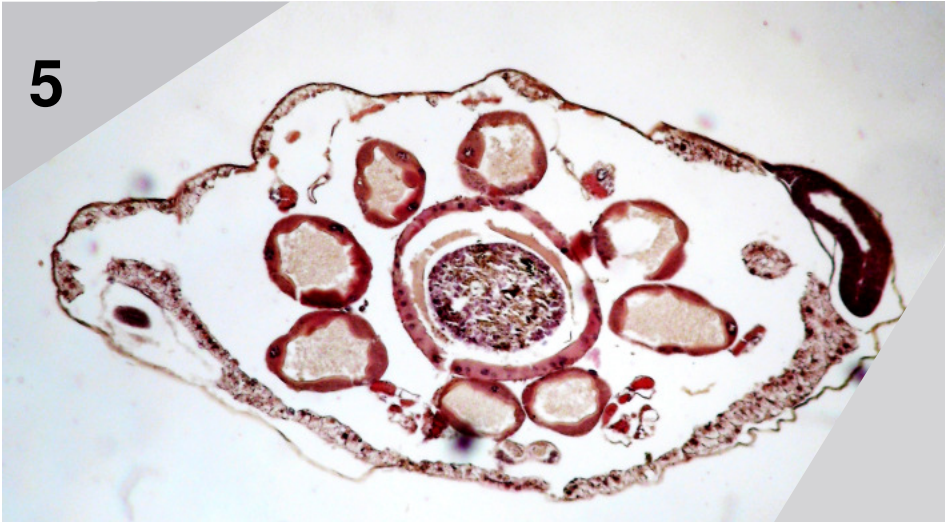

6

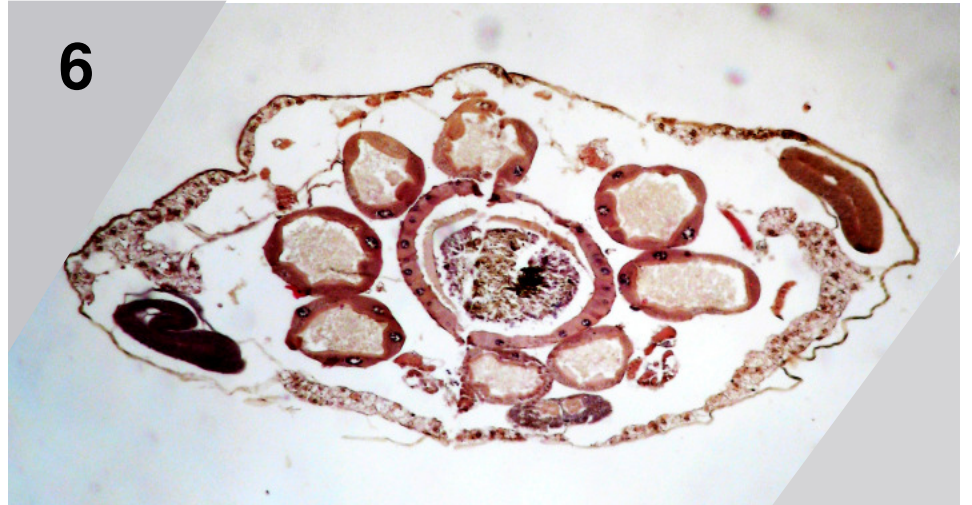

7

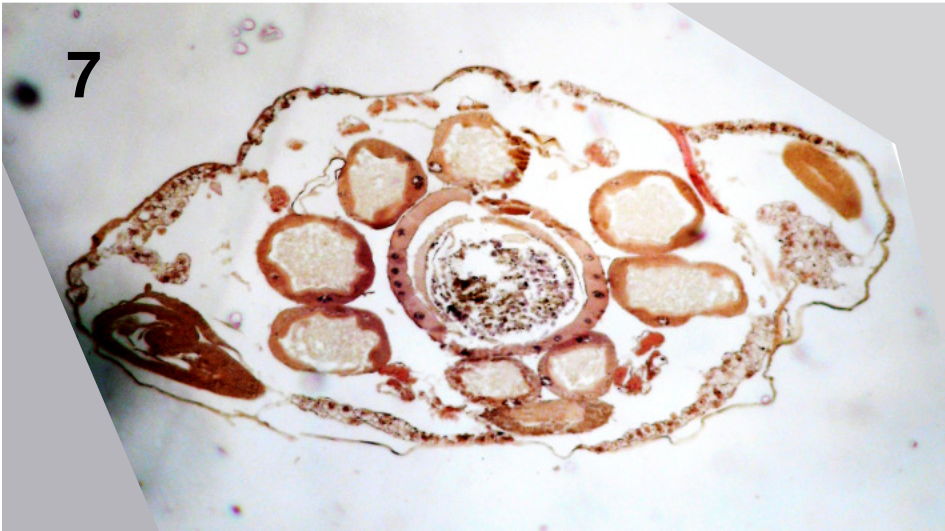

8

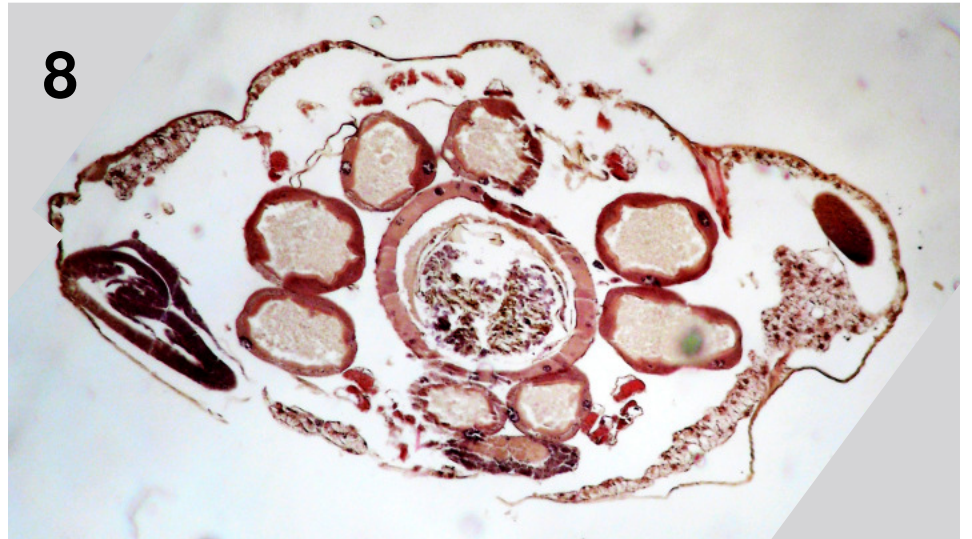

First control L4I (continued)

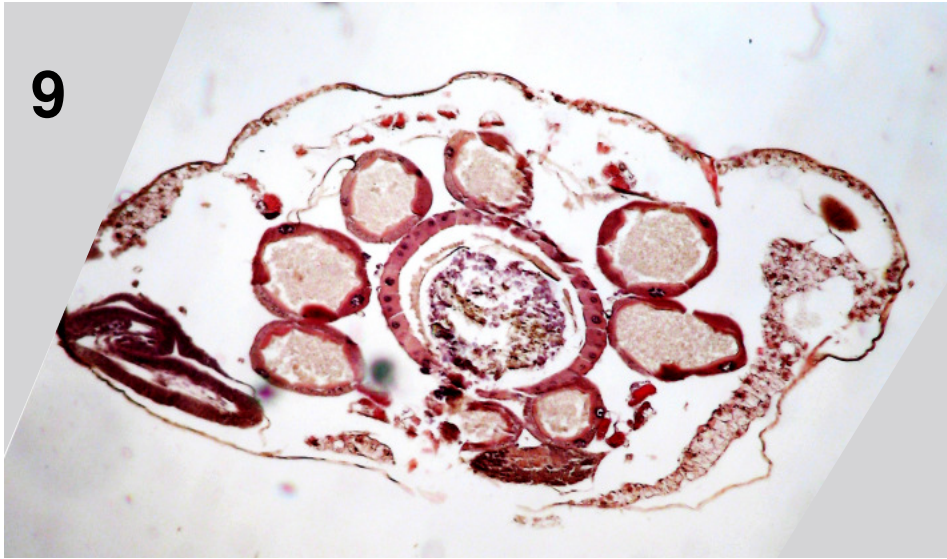



Second control L4I

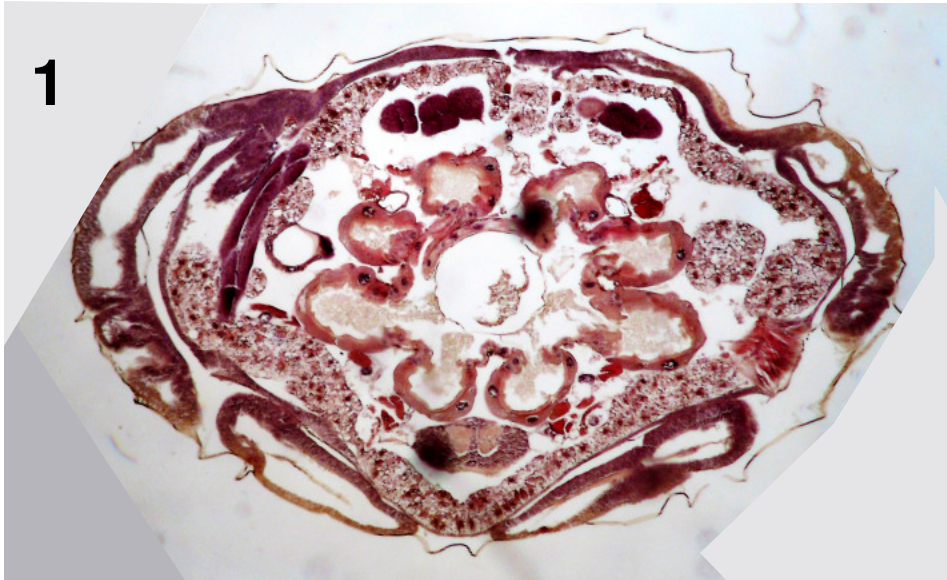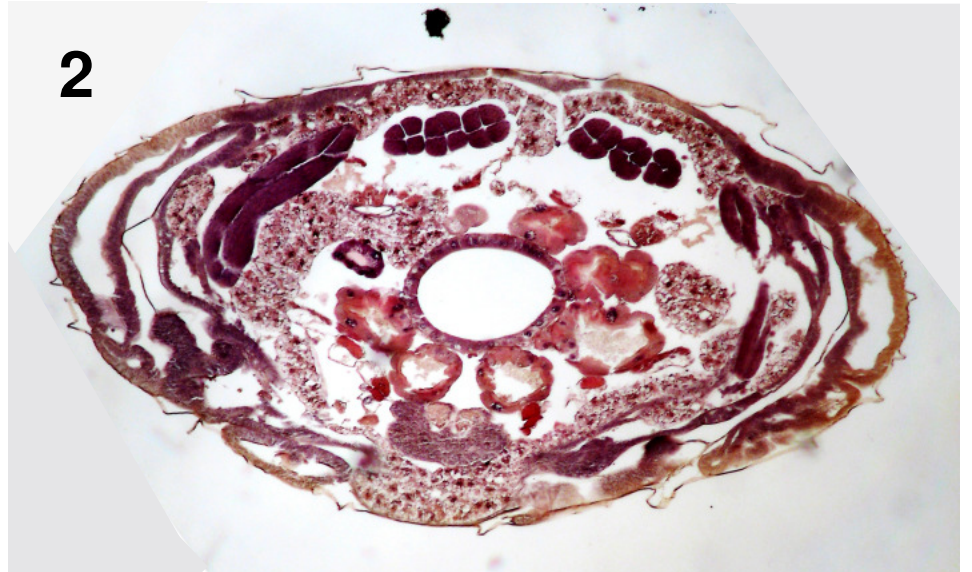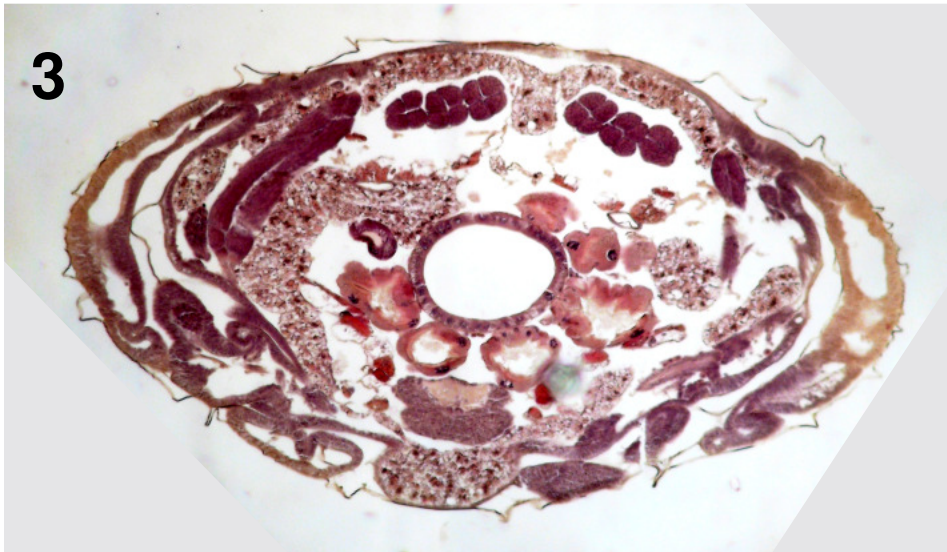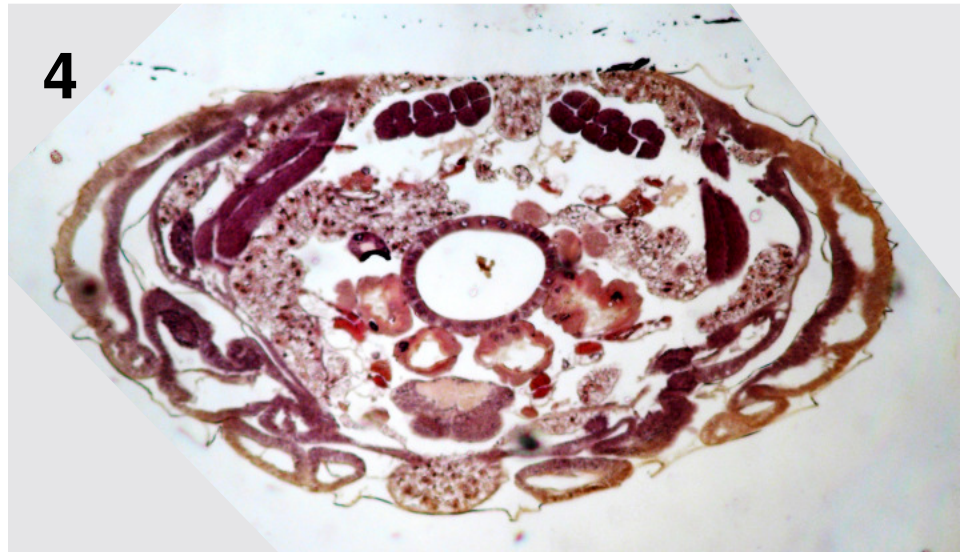



Third control L4I

1

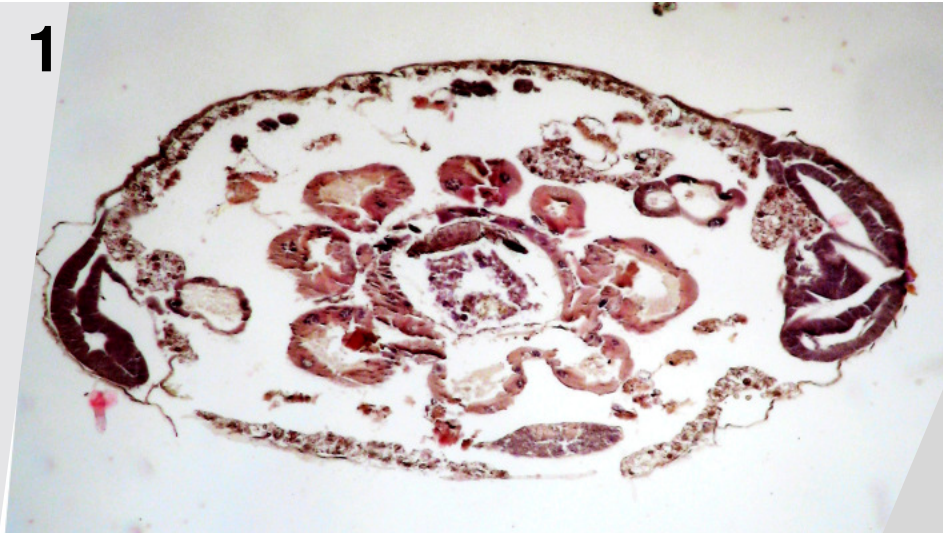

2

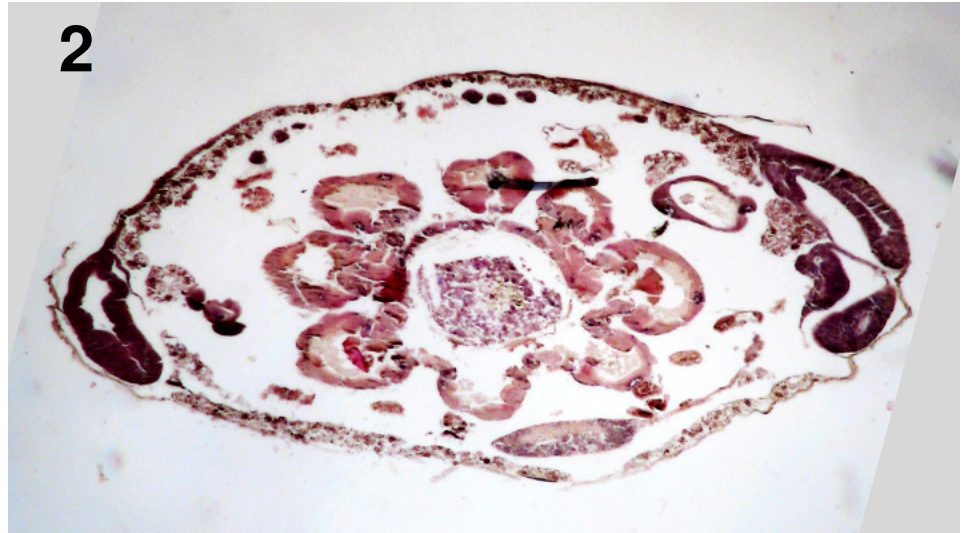

3

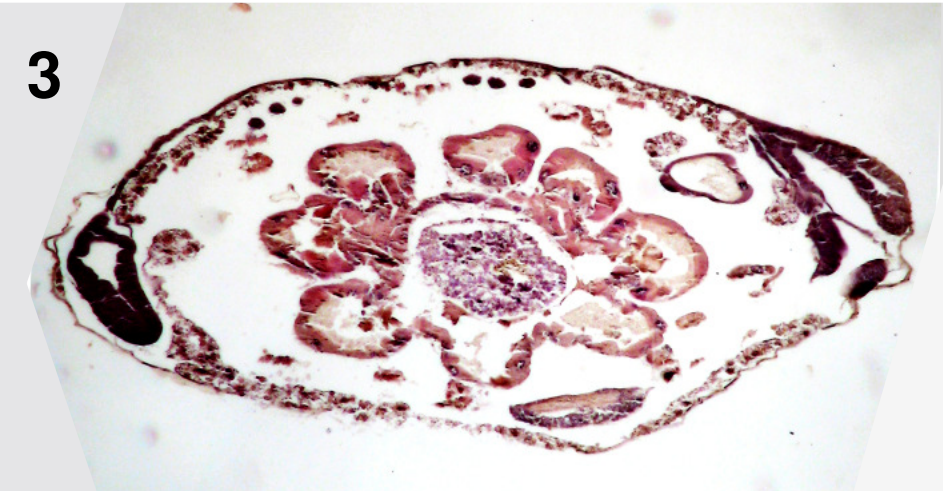

4

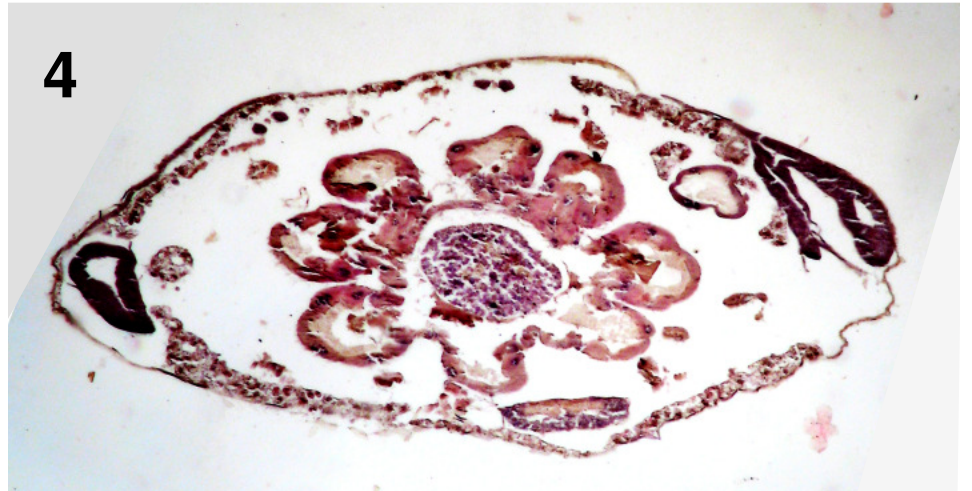



Fourth control L4l

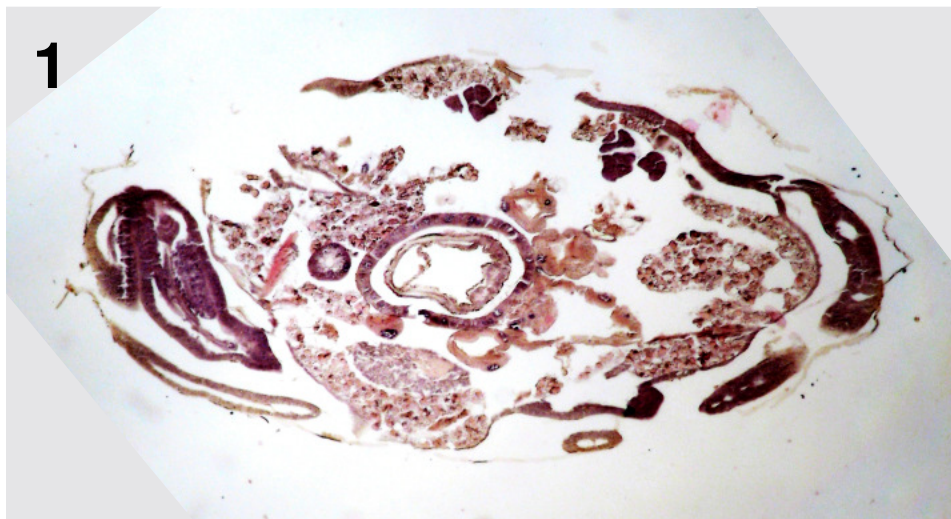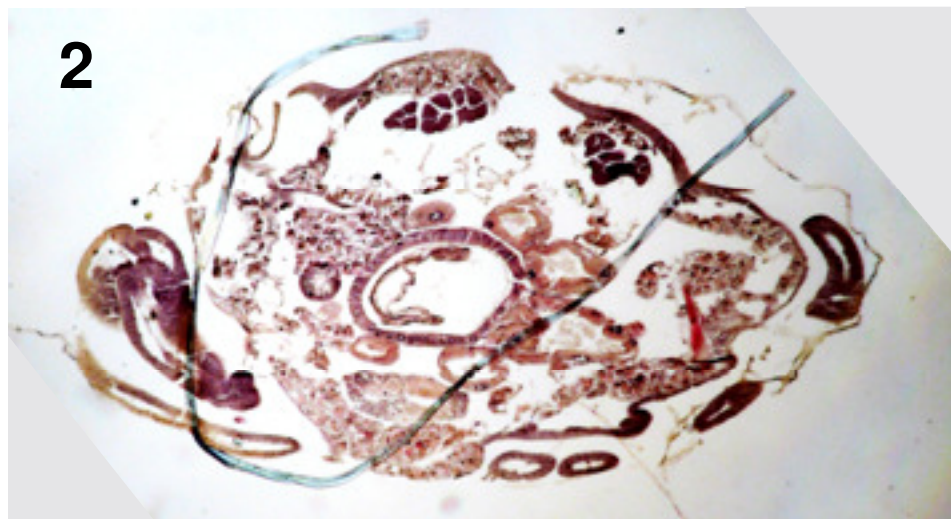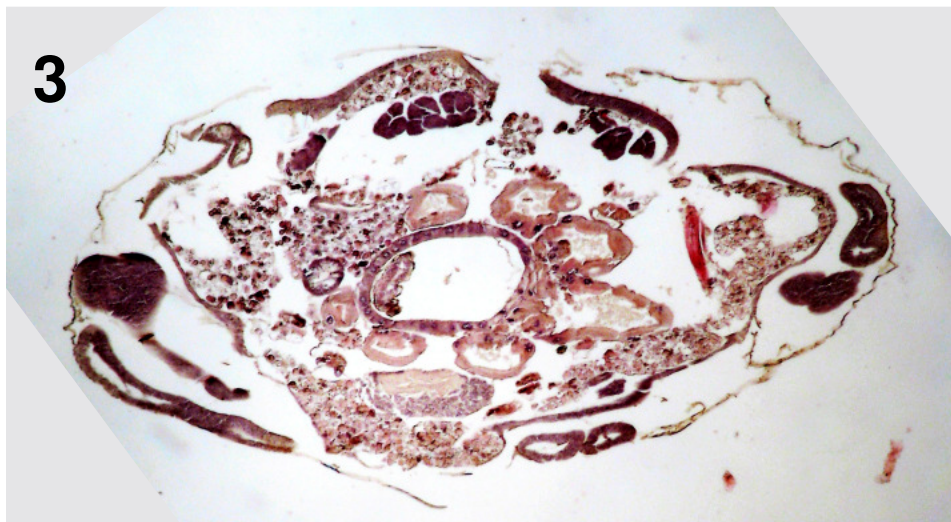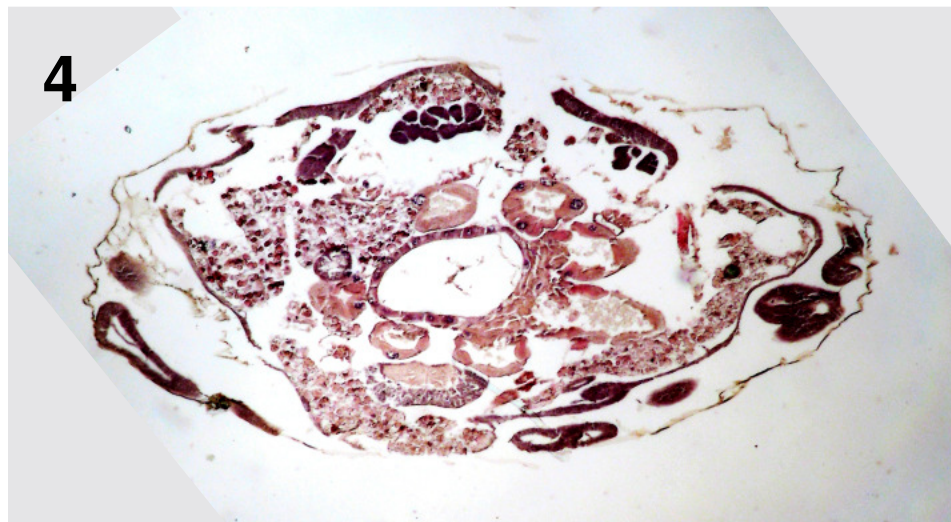



The next 6 slides show cross sections of 3 novaluron-treated larvae (E1<sub>99</sub>) at the L4I stage.

# First Novaluron L4l

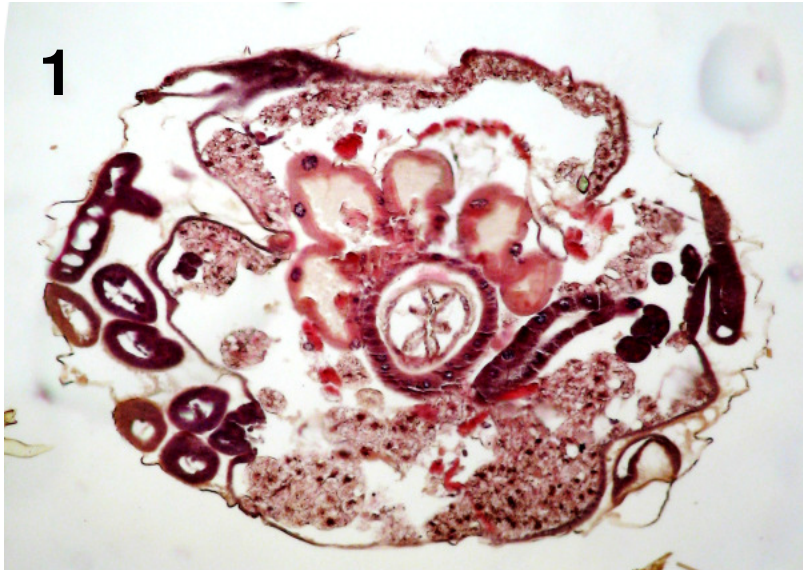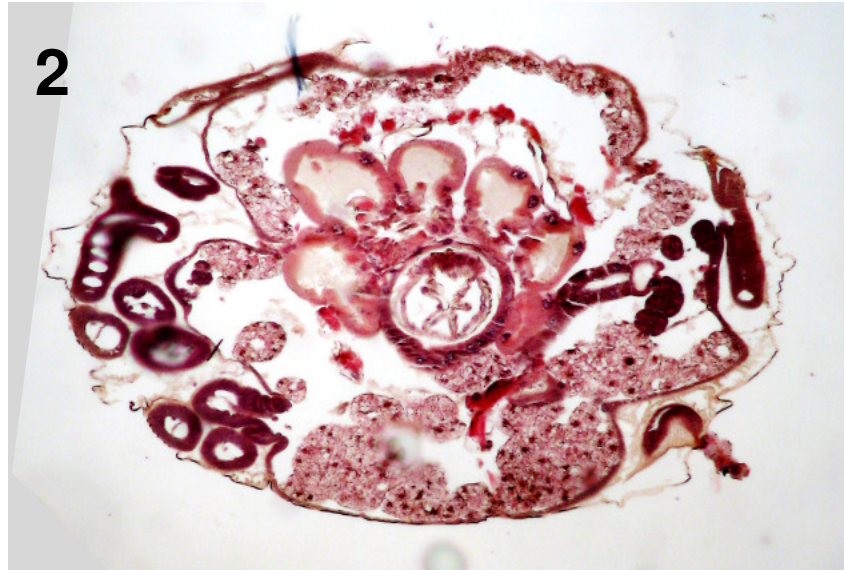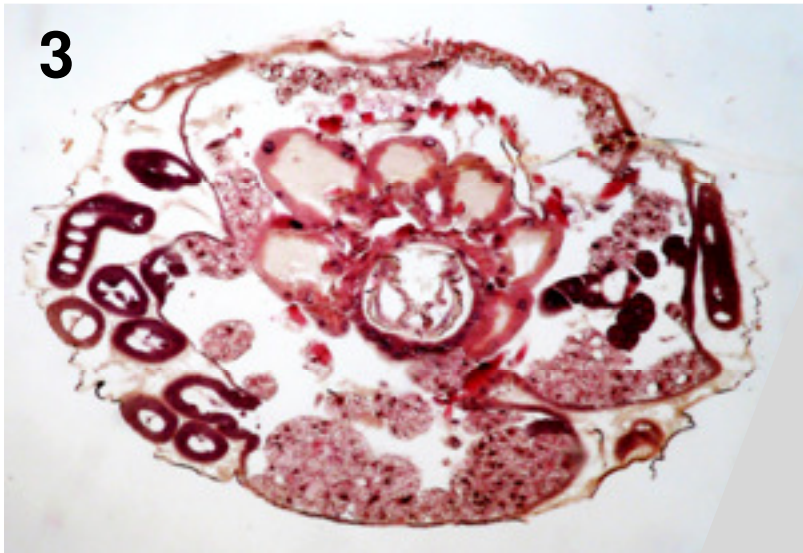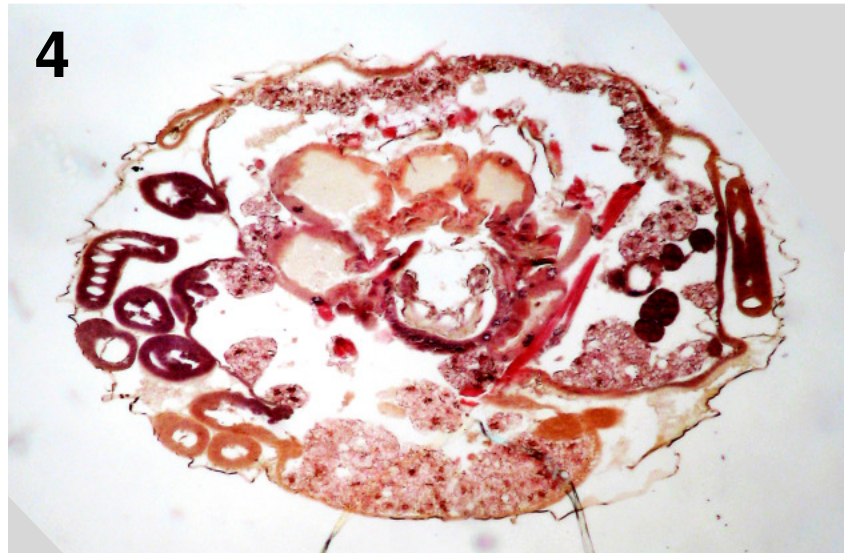



First Novaluron L4I (continued)

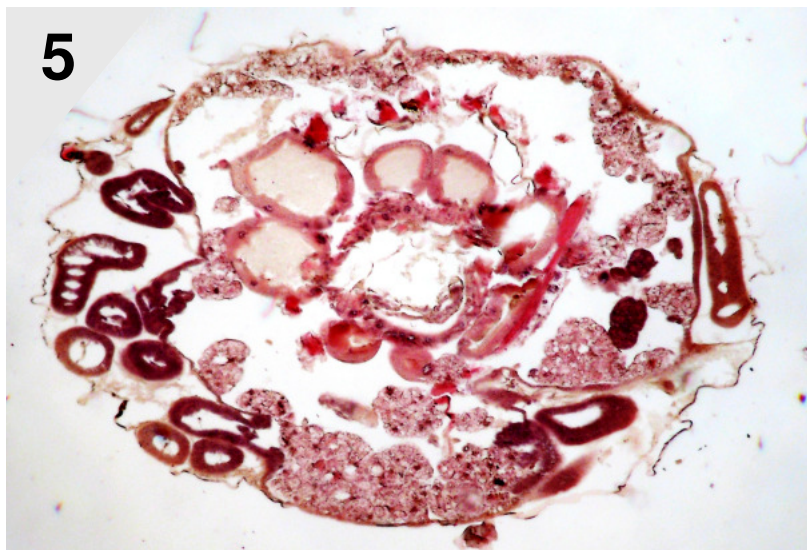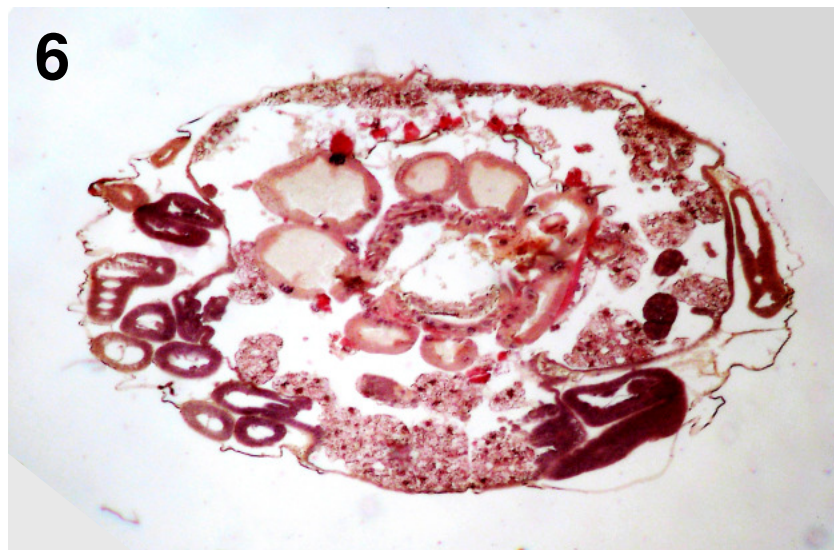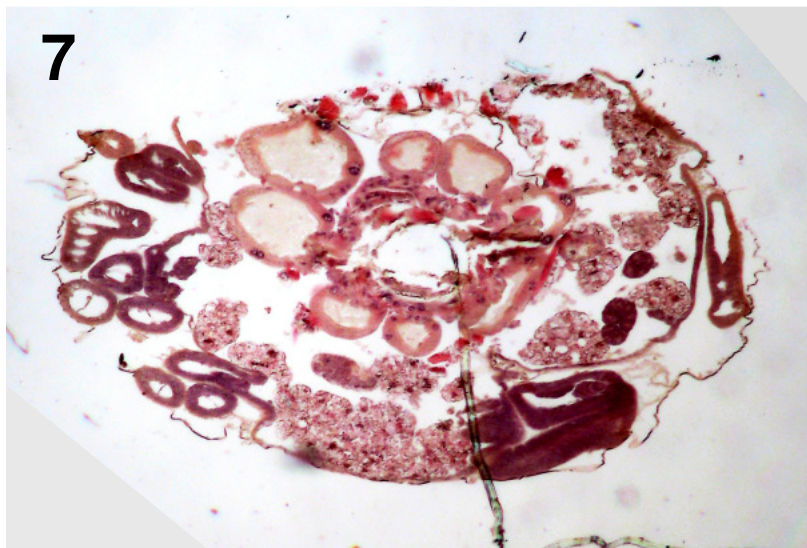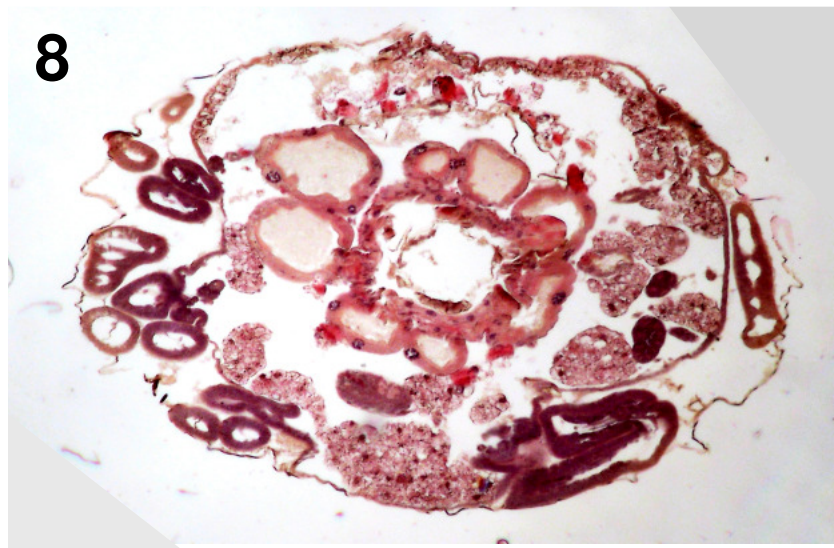



First Novaluron L4I (continued)

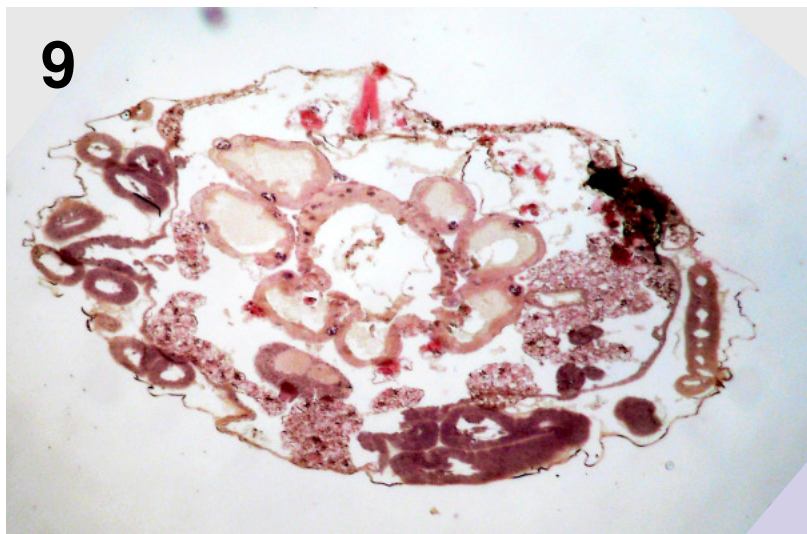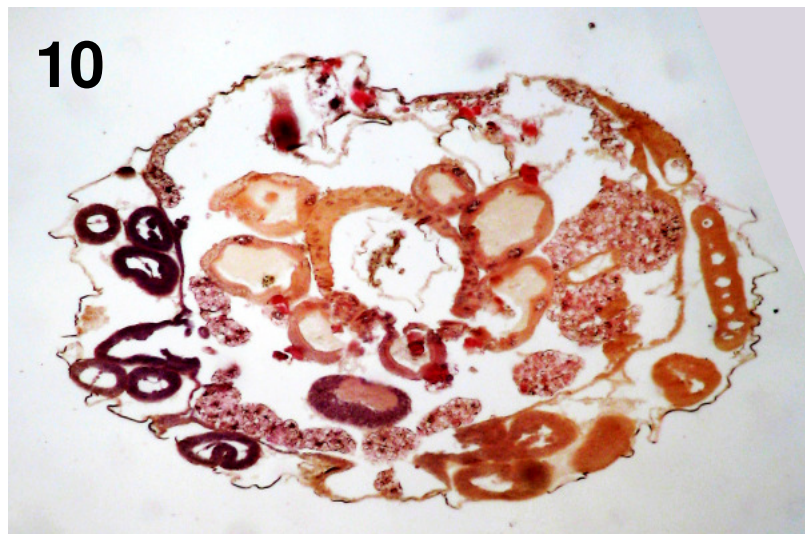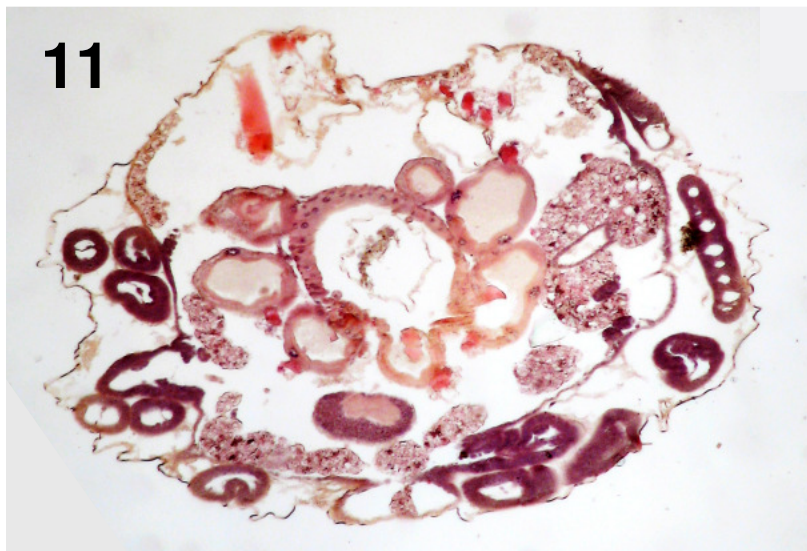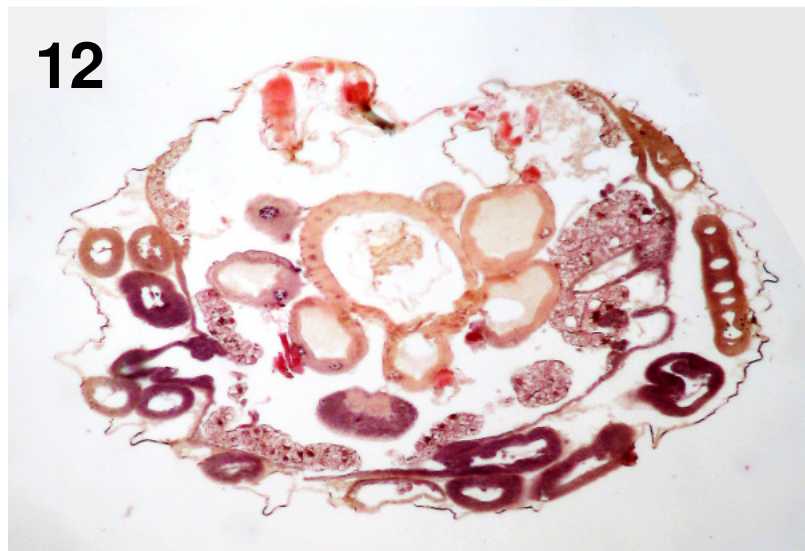



## Second Novaluron L4I

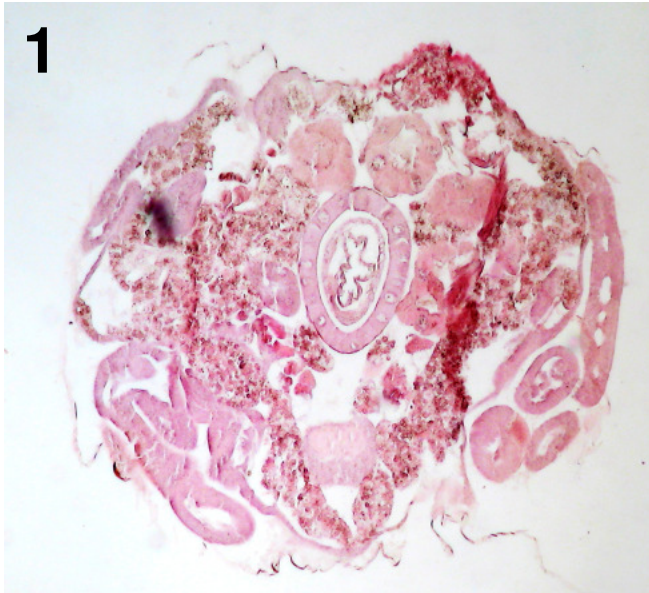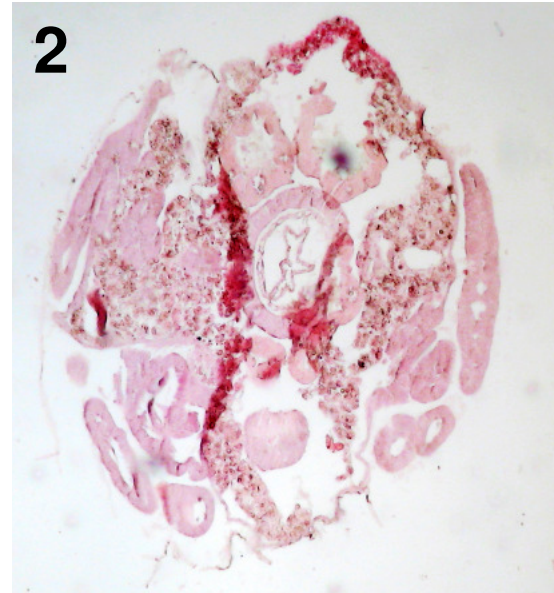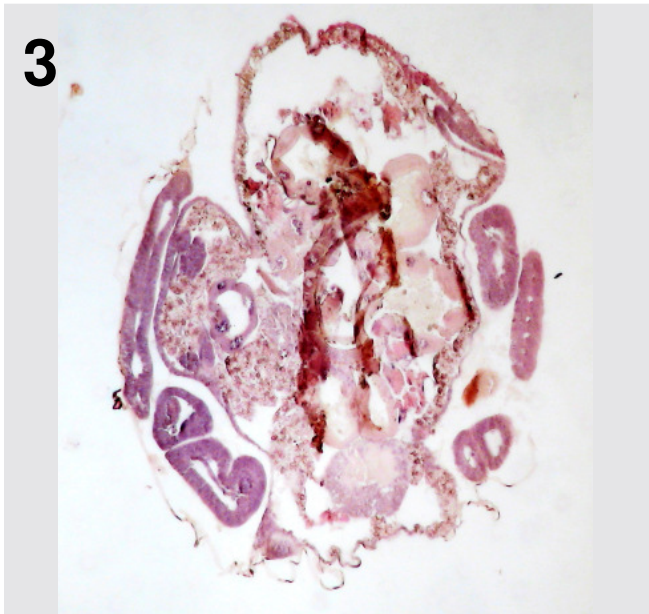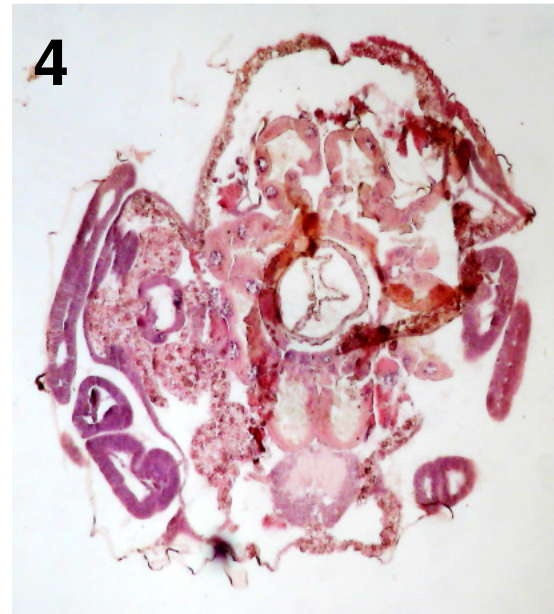

Second Novaluron L4l (continued)

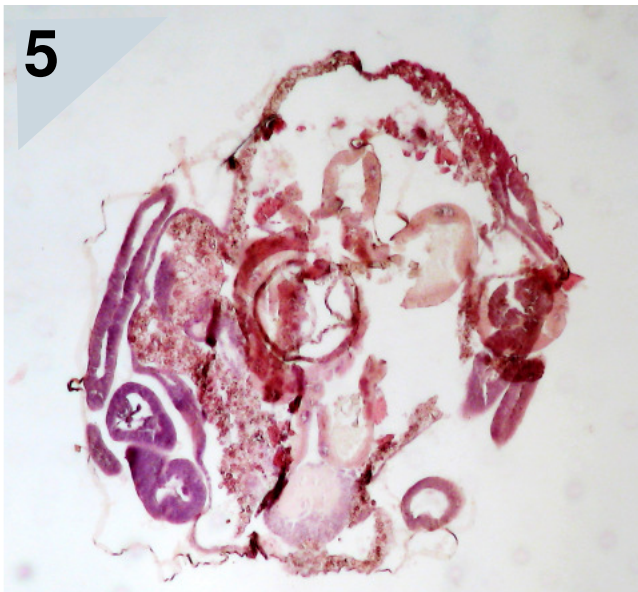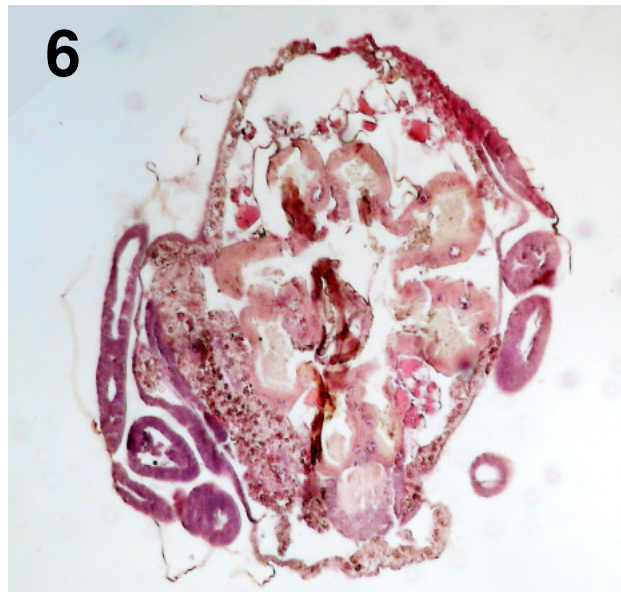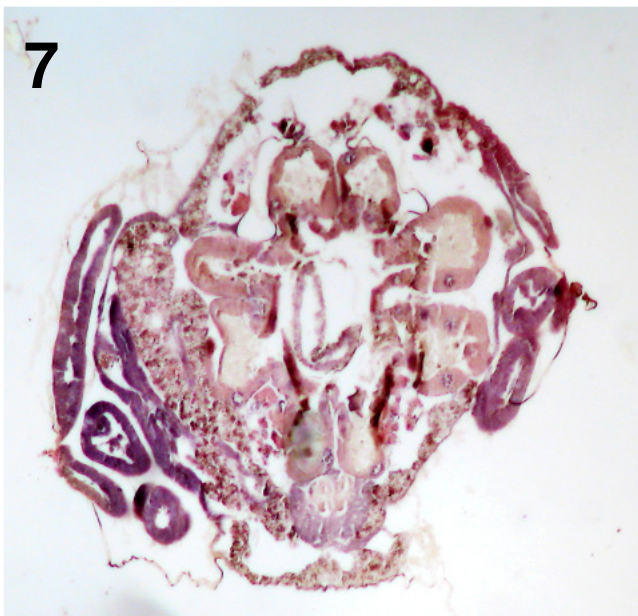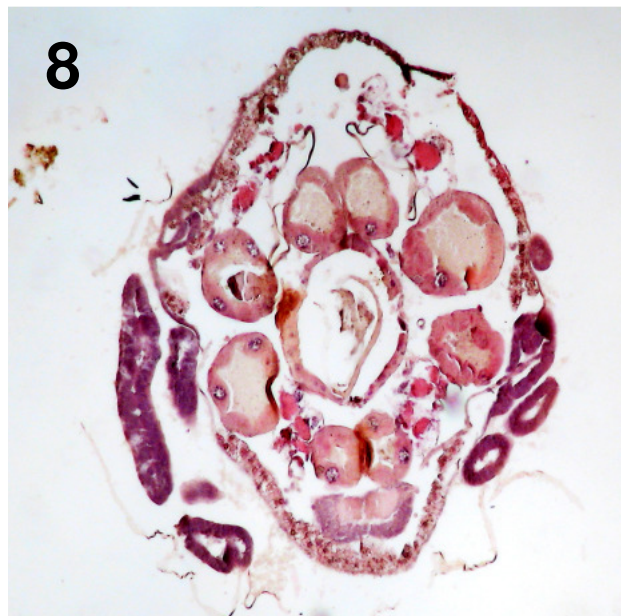



# Third Novaluron L4I

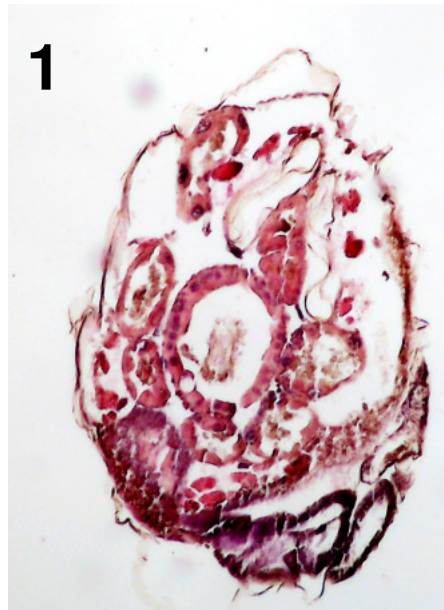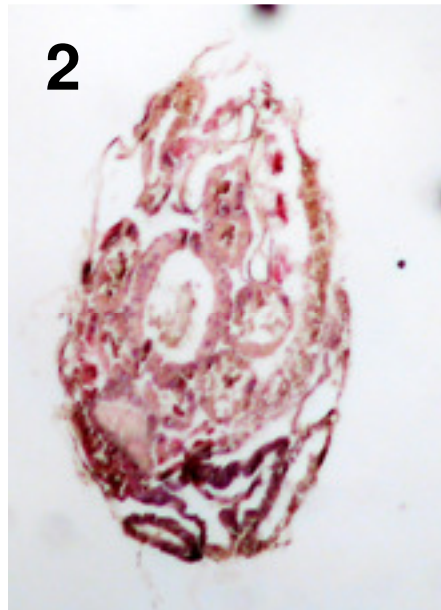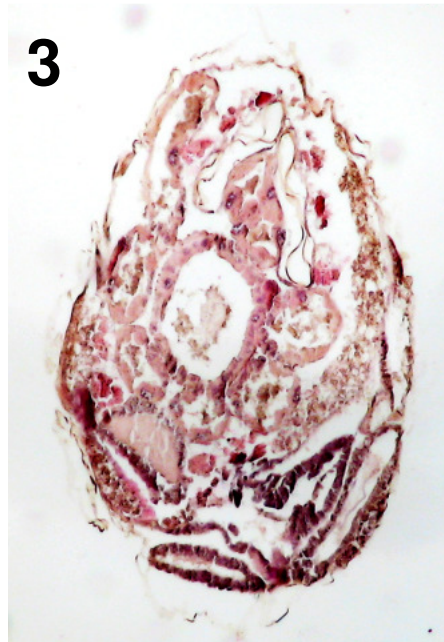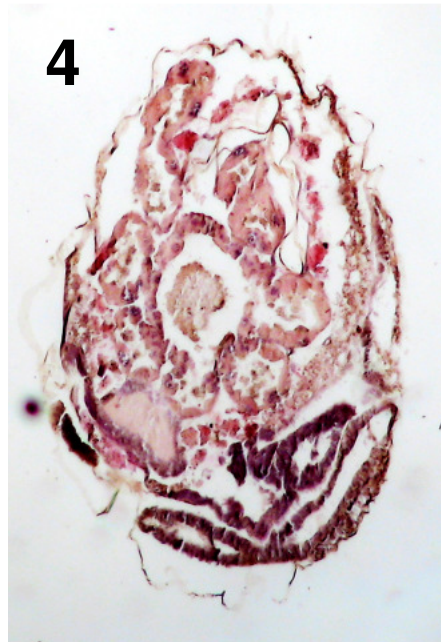

Supplement: pone.0030363.s002.pdf [file pone.0030363.s002.pdf]
