# Supplementary material for: Physiological and Morphological Aspects of Aedes aegypti Developing Larvae: Effects of the Chitin Synthesis Inhibitor Novaluron
Source: PubMed Central journal article supplement (PMC3265478; doi:10.1371/journal.pone.0030363), 2012-01-24
Supplement: pone.0030363.s001.pdf [file pone.0030363.s001.pdf]

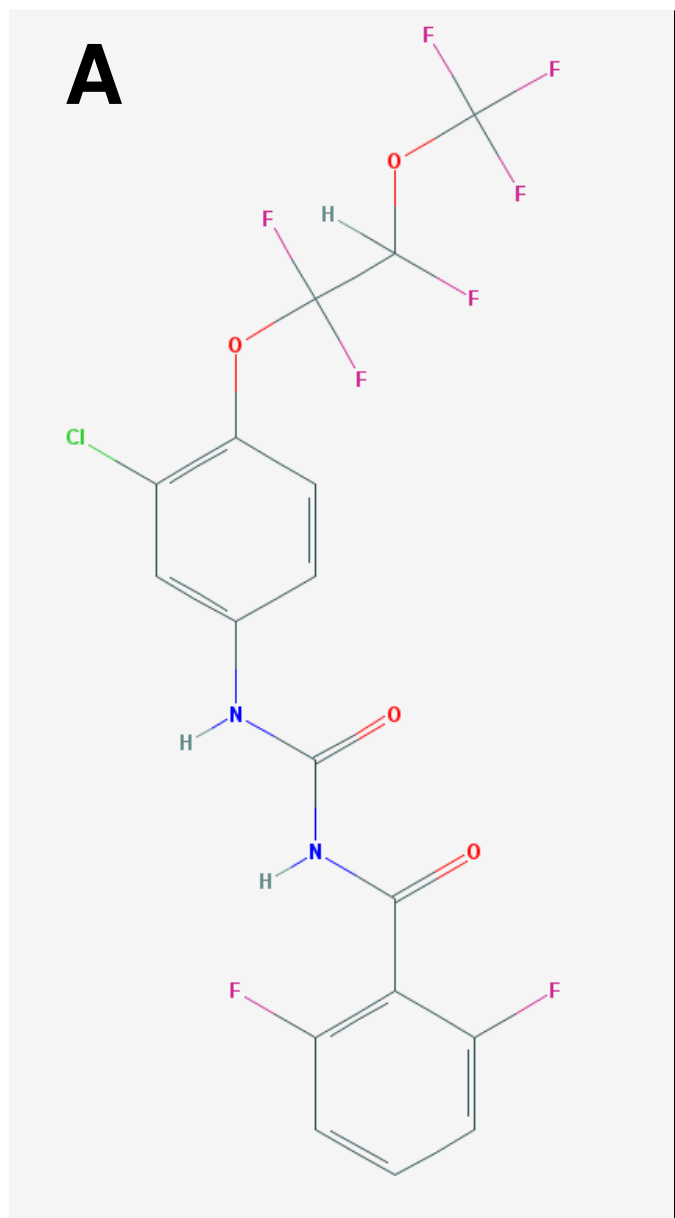

**B**

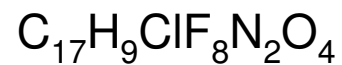

**C**

**N-[[3-chloro-4-[1,1,2-trifluoro-2-(trifluoromethoxy)ethoxy]phenyl]carbamoyl]-2,6-difluorobenzamide**

**Supplementary Figure 1: Novaluron chemical information.** (A) Structure, (B) Molecular formula and (C) IUPAC name. Adapted from PubChem website (<http://pubchem.ncbi.nlm.nih.gov/>).
